# Supplementary material for: Genome Annotation of Burkholderia sp. SJ98 with Special Focus on Chemotaxis Genes
Source: PLoS One. 2013 Aug 5;8(8):e70624. doi: 10.1371/journal.pone.0070624 (PMC3734258; doi:10.1371/journal.pone.0070624)
Supplement: Sheet S1 — Location of 31 housekeeping genes in the genome of Burkholderia sp. SJ98 and Burkholderia sp. YI23. (XLS) [file pone.0070624.s010.xls]

## Sheet: Sheet1
Burkholderia sp. SJ98					Burkholderia sp. YI23
Gene	Contig	Location	Strand	Length	Chromosome	Location	Strand	Length
dnaG	Contig14	924493-926370	-	625	chromosome2	1277202-1279085	-	627
frr	Contig13	534987-535547	-	186	chromosome1	1203949-1204509	+	186
infC	Contig13	602272-602745	-	157	chromosome1	1136764-1137237	+	157
nusA	Contig13	34434-35909	+	491	chromosome1	1841463-1842938	-	491
pgk	Contig13	1236786-1237982	-	398	chromosome1	524565-525761	+	398
pyrG	Contig1	100115-101803	-	562	chromosome1	1984735-1986429	-	564
rplA	Contig4	1696-2394	+	232	chromosome1	2758443-2759141	-	232
rplB	Contig4	21404-22231	+	275	chromosome1	2738635-2739462	-	275
rplC	Contig4	19811-20470	+	219	chromosome1	2740396-2741055	-	219
rplD	Contig4	20470-21090	+	206	chromosome1	2739776-2740396	-	206
tsf	Contig13	536607-537488	-	293	chromosome1	1202007-1202888	+	293
rplE	Contig4	25561-26100	+	179	chromosome1	2734769-2735308	-	179
rplF	Contig4	26842-27372	+	176	chromosome1	2733494-2734027	-	177
rplK	Contig4	1264-1695	+	143	chromosome1	2759142-2759573	-	143
rplL	Contig4	3279-3656	+	125	chromosome1	2757184-2757558	-	124
rplM	Contig13	1391068-1391496	-	142	chromosome1	367167-367631	+	154
rplN	Contig4	24860-25228	+	122	chromosome1	2735641-2736009	-	122
rplP	Contig4	23667-24083	+	138	chromosome1	2736782-2737198	-	138
rplS	Contig1	321588-321977	-	129	chromosome1	2204331-2204720	-	129
rplT	Contig13	601455-601814	-	119	chromosome1	1137692-1138051	+	119
rpmA	Contig1	701321-701581	-	86	chromosome1	2549565-2549825	-	86
rpoB	Contig1	4025-8131	+	1368	chromosome1	2752709-2756815	-	1368
rpsB	Contig13	537629-538381	-	250	chromosome1	1201109-1201861	+	250
rpsC	Contig4	22870-23664	+	264	chromosome1	2737201-2737995	-	264
rpsE	Contig4	27765-28283	+	172	chromosome1	2732583-2733101	-	172
rpsI	Contig13	1390664-1391056	-	130	chromosome1	367643-368035	+	130
rpsJ	Contig4	19289-19600	+	103	chromosome1	2741264-2741575	-	103
rpsK	Contig4	31128-31532	+	134	chromosome1	2729334-2729738	-	134
rpsM	Contig4	30734-31099	+	121	chromosome1	2729767-2730132	-	121
rpsS	Contig4	22242-22517	+	91	chromosome1	2738349-2738624	-	91
smpB	Contig13	516710-517159	+	149	chromosome1	1222331-1222780	-	149
